# Supplementary material for: Time-frequency analysis of 5xFAD mice circadian actigrams as early behavioral diagnostics
Source: Research Square preprint supplement (doi:10.21203/rs.3.rs-7538307/v1), 2025-09-12
Supplement: Supplementary file 1 [file 370471828ee4a8fd1f2af123.docx]

| A   | B   |
| --- | --- |
| C   | D   |

Supplementary Figure 1. Raw data of individual seismoacoustic recordings, minute-by-minute presentation. **A.** 5xFAD-Tg (males); **B.** Non-Tg (males); **C.** 5xFAD-Tg (females); **D.** Non-Tg (females).

| A  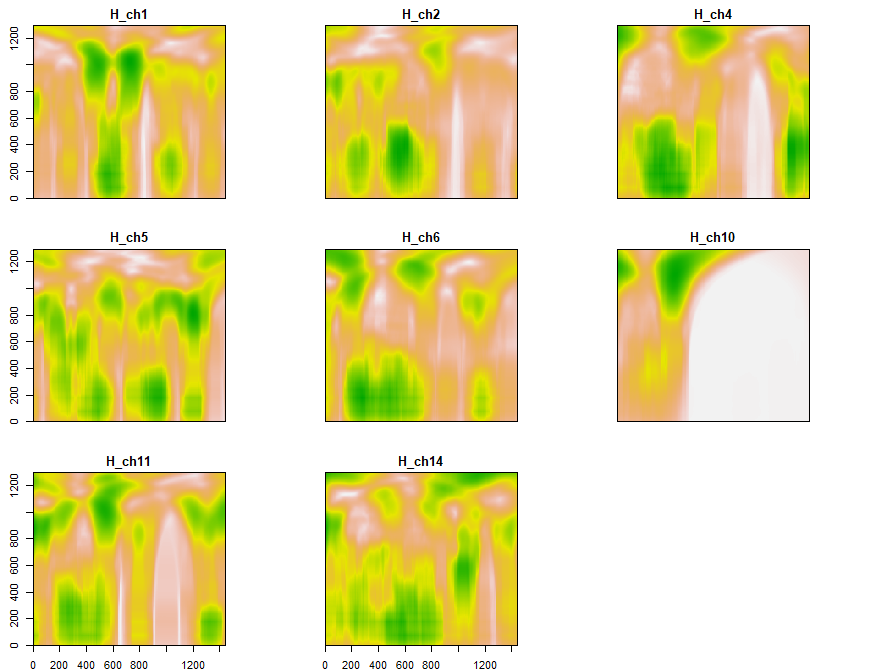 | B  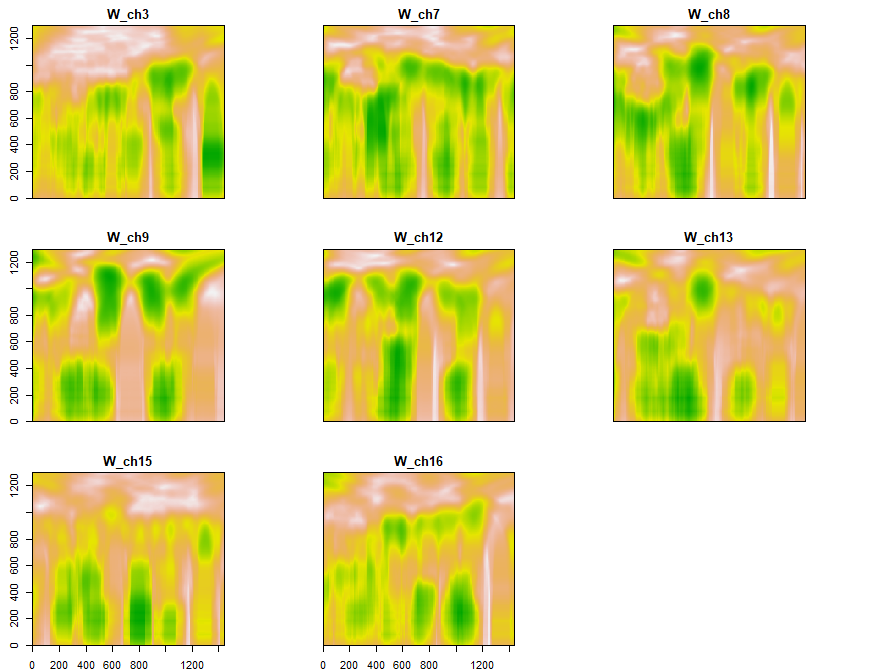 |
| --- | --- |
| C  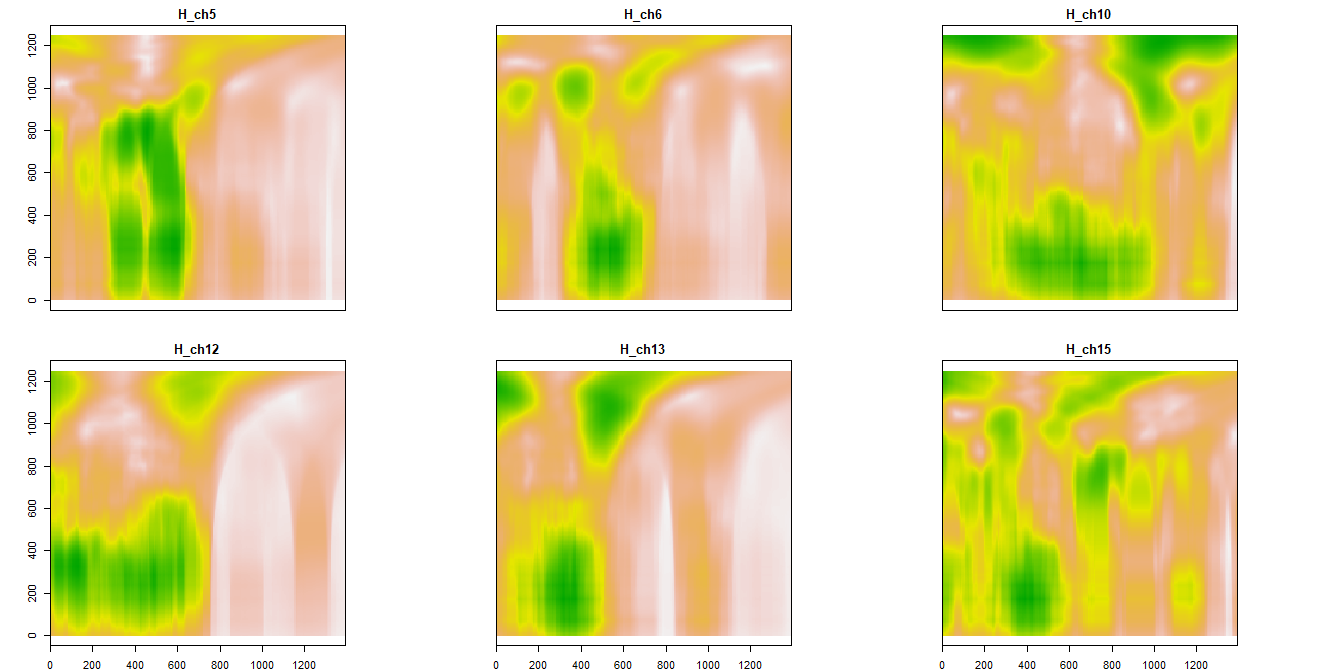 | D  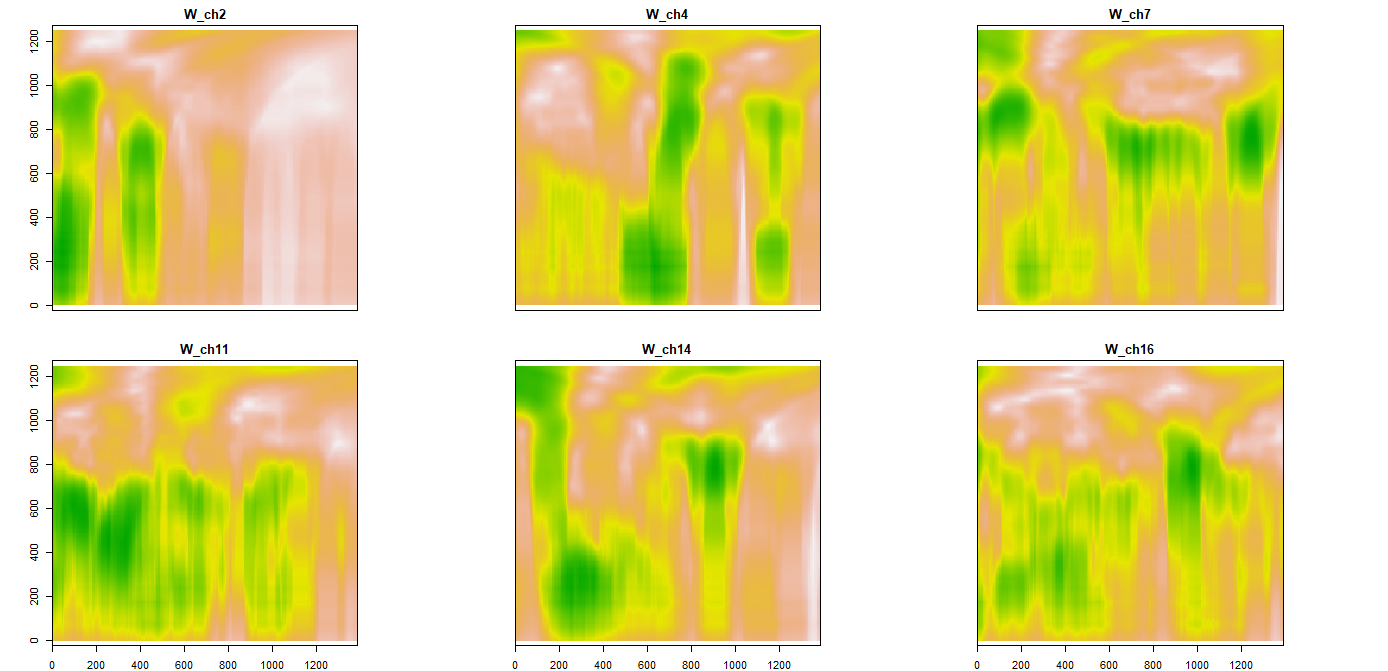 |

Supplementary Figure 2. Individual wavelet spectrograms by sex and genotype. **A.** 5xFAD-Tg (males); **B.** Non-Tg (males); **C.** 5xFAD-Tg (females); **D.** Non-Tg (females)
